# Supplementary material
Source: PubMed Central journal article supplement (PMC1323223)
Supplement: pnas_0509856103_1.pdf [file pnas_0509856103_1.pdf]

## Supporting Text

**Ca<sup>2+</sup> Threshold Model with Feedback from VDCCs.** The model has a number of interacting components, including the NMDA-mediated Ca<sup>2+</sup> flux and associated accumulation of Ca<sup>2+</sup>, the back-propagating action potential (bAP), the pathways that convert the peak of the Ca<sup>2+</sup> flux into competing long-term potentiation (LTP) and long-term depression (LTD) signals and feedback from voltage-dependent Ca<sup>2+</sup> channels (VDCCs) that temporarily suppresses LTP.

The NMDA-receptor-mediated Ca<sup>2+</sup> flux is modeled by using the classical description

$$I_{NMDA} = -G_{NMDA} \cdot m \cdot (V(t) - V_{Ca}) \cdot B(V). \quad [1]$$

In Eq. 1,  $G_{NMDA} = 1$  is a constant corresponding to the maximal conductance of the receptor,  $V(t)$  is the postsynaptic membrane potential, and  $V_{Ca}$  (150 mV) is the reversal potential for calcium ions. Finally,  $B(V)$  is a function describing the magnesium block of the receptor.

The glutamate activation  $m$  is a time-varying signal that varies from 0 to 1. In response to each postsynaptic AP,  $m(t)$  rises and falls biexponentially:

$$m(t) = \left[ e^{-(t-t_{sp})/\tau_{NMDA_f}} - e^{-(t-t_{sp})/\tau_{NMDA_r}} \right] u(t-t_{sp}), \quad [2]$$

where  $t_{sp}$  is the time of occurrence of the presynaptic spike,  $\tau_{NMDA_f}$  is the decay time constant of the conductance (14 ms), and  $\tau_{NMDA_r}$  is the rising time constant (1 ms). The Heaviside step function  $u(t-t_{sp})$  ensures that  $m(t)$  is engaged only after the presynaptic AP.

$V(t)$  is the membrane potential of the postsynaptic cell at the synapse site during the bAP, which contributes to the driving force of the NMDA-mediated flux. The depolarization associated with the bAP is assumed to follow a dual exponential waveform:

$$V(t) = V_{rest} + \frac{A}{K_1} \left[ e^{-\frac{(t-t_{bAP})}{AP_{width} \tau_{bAP\_fall}}} - e^{-\frac{(t-t_{bAP})}{\tau_{bAP\_rise}}} \right] \cdot u(t - t_{bAP}). \quad [3]$$

In Eq. [3],  $K_1$  is the peak amplitude of the subtracted exponentials, related to the two time constants: rising,  $\tau_{bAP\_rise} = 0.2$  ms, and falling,  $\tau_{bAP\_fall} = 1.0$  ms. The resting potential,  $V_{rest}$ , is chosen to be  $-60$  mV, and the amplitude,  $A$ , to be  $80$  mV. The model AP, therefore, consists of a depolarization from [minus]60 to  $+20$  mV. The factor  $AP_{width}$  is used to scale the decay-time constant. We used  $AP_{width} = 1.0$  for control conditions and  $AP_{width} = 1.5$  to model the spike-broadening effects of internal TEA.

The ‘‘magnesium block’’ function  $B(V)$  is defined as:

$$B(V) = \frac{3.57}{[Mg^{2+}]} \cdot \frac{1}{1 + e^{-0.062(V - V_B^*)}}, \quad [4]$$

where  $[Mg^{2+}]$  is the constant external concentration of magnesium ions.  $V_B^* = -9$  mV, and the value of  $B(V)$  increase rapidly near this potential to allow considerable receptor current and  $Ca^{2+}$  influx.

$Ca^{2+}$  entering through NMDA receptors is assumed to accumulate in a region near the receptor (microdomain) and to passively diffuse away from this region. These processes are modeled using a first-order differential equation:

$$\frac{d}{dt} [Ca^{2+}] = I_{NMDA} \cdot \gamma - \frac{[Ca^{2+}]}{\tau_{Ca^{2+}}}. \quad [5]$$

In equation [5],  $I_{NMDA}$  is the NMDA-receptor current calculated from Eq [1].  $\gamma = 0.78$  is a normalization factor controlling how fast  $[Ca^{2+}]$  rises for a given  $Ca^{2+}$  influx. This factor depends on the size of microdomain. Calcium concentrations are assumed to decay to 0 with a time constant of  $\tau_{Ca^{2+}} = 5$  ms.

The calcium signal that drives LTP pathway is passed to a quadratic nonlinearity:

$$f(x(t)) = ax^2(t) + bx(t), \quad [6]$$

where  $a = 0.0065$ ,  $b = 0.902$ , and

$$x(t) = [Ca^{2+}](t) \cdot (1 - S(t)). \quad [7]$$

This nonlinear gain for LTP is qualitatively compatible with the autocatalytic nature of calcium-calmodulin kinase II, known to be crucial for mediating LTP. In Eq. [7],  $[Ca^{2+}](t)$  is the numerical solution of Eq. [5]. The voltage-dependent calcium channel (VDCC)-mediated suppression signal  $S(t)$  is assumed to have a biexponential waveform, triggered after a specific delay after the onset of the bAP:

$$S(t) = \frac{AP_{Width} S_{max}}{K_2} \left[ e^{-(t-t_{bAP}-Sdelay)/\tau_{fall}} - e^{-(t-t_{bAP}-Sdelay)/\tau_{rise}} \right] \cdot u(t - (t_{bAP} + Sdelay)). \quad [8]$$

In Eq. [8], the normalization factor  $K_2$  is equal to the maximum value of the subtracted exponentials.  $S_{max}$  is the maximum value of the suppression signal. This suppression signal  $S$  rises with time constant  $\tau_{rise}$ , and falls with time constant  $\tau_{fall}$ , and is triggered after the onset of the bAP by an absolute delay,  $Sdelay$ . In the model, we used the values  $S_{max} = 0.65$ ,  $\tau_{rise} = 2ms$ ,  $\tau_{fall} = 20 ms$ , and  $Sdelay = 0.5 ms$ . The amount of suppression is scaled by  $AP_{width}$ , described for Eq. [3].

The direction of the plasticity is then simply determined by the mathematical difference between the peak  $[Ca^{2+}]$  of LTP and LTD pathways:

$$LTP - LTD = \max(f(x(t))) - \max([Ca^{2+}](t)). \quad [9]$$
